# Supplementary material for: Dapagliflozin reduces uric acid concentration, an independent predictor of adverse outcomes in DAPA‐HF
Source: PubMed Central journal article supplement — Eur J Heart Fail. 2022 Feb 6;24(6):1066–76. doi: 10.1002/ejhf.2433 (PMC9540869; doi:10.1002/ejhf.2433), 2022-02-06
Supplement: EJHF-24-1066-s002.pdf [file EJHF-24-1066-s002.pdf]

### Cardiovascular death or worsening heart failure event

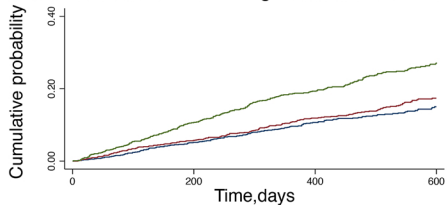

| Number at risk  |      |     |     |
|-----------------|------|-----|-----|
| UA <5.4mg/dL    | 1020 | 829 | 362 |
| UA 5.4-6.7mg/dL | 1052 | 986 | 817 |
| UA >6.8mg/dL    | 981  | 875 | 700 |

— UA <5.4mg/dL    — UA 5.4-6.7mg/dL  
 — UA >6.8mg/dL

### Heart Failure Hospitalization

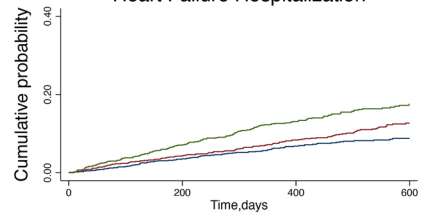

| Number at risk  |      |      |     |
|-----------------|------|------|-----|
| UA <5.4mg/dL    | 1086 | 1020 | 829 |
| UA 5.4-6.7mg/dL | 1052 | 986  | 817 |
| UA >6.8mg/dL    | 981  | 875  | 700 |

— UA <5.4mg/dL    — UA 5.4-6.7mg/dL  
 — UA >6.8mg/dL

### Cardiovascular Death

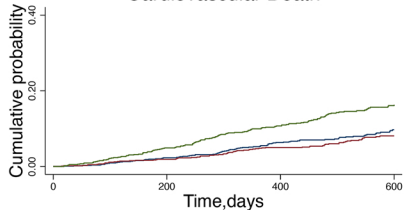

| Number at risk  |      |      |     |
|-----------------|------|------|-----|
| UA <5.4mg/dL    | 1086 | 1053 | 878 |
| UA 5.4-6.7mg/dL | 1052 | 1027 | 882 |
| UA >6.8mg/dL    | 981  | 931  | 768 |

— UA <5.4mg/dL    — UA 5.4-6.7mg/dL  
 — UA >6.8mg/dL

### All Cause Mortality

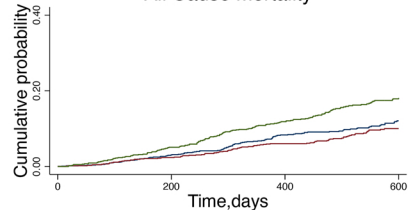

| Number at risk  |      |      |     |
|-----------------|------|------|-----|
| UA <5.4mg/dL    | 1086 | 1053 | 878 |
| UA 5.4-6.7mg/dL | 1052 | 1027 | 882 |
| UA >6.8mg/dL    | 981  | 931  | 768 |

— UA <5.4mg/dL    — UA 5.4-6.7mg/dL  
 — UA >6.8mg/dL
